# Supplementary material for: Development of an Immunochromatographic Strip Using Conjugated Gold Nanoparticles for the Rapid Detection of Klebsiella pneumoniae Causing Neonatal Sepsis
Source: MDPI journal article supplement (doi:10.3390/pharmaceutics13081141), 2021-07-26
Supplement: s1 [file s1]

# Supplementary Materials: Development of an Immunochromatographic Strip Using Conjugated Gold Nanoparticles for the Rapid Detection of *Klebsiella pneumoniae* Causing Neonatal Sepsis

Noha M. Elhosseiny, Tamer M. Samir, Aliaa A. Ali, Amani A. El-Kholy and Ahmed S. Attia

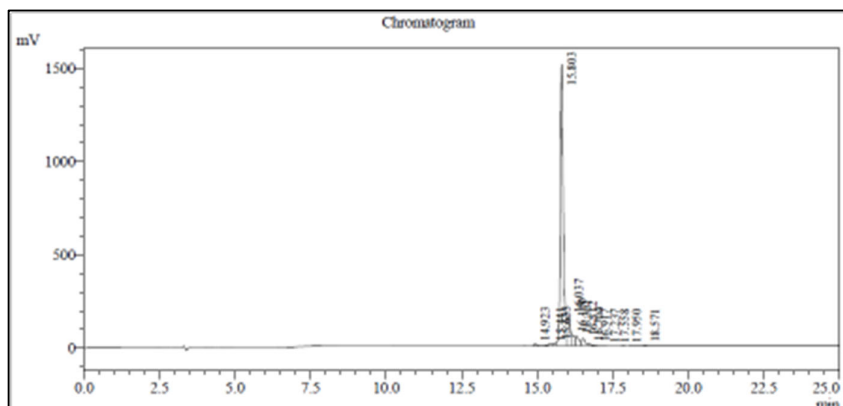

**Figure S1.** HPLC chromatogram showing one major peak for KP\_397(50-68) at retention time of 15.8 min. Analysis was carried out using Alltima™ C18 5  $\mu$ m, 4.6  $\times$  250 mm column, mobile phase A: 0.065% TFA in water & B:0.05% TFA in acetonitrile, at flow rate of 1 ml/min and detection at 220 nm.

**Table S1.** Analysis of the peaks detected in the HPLC of KP\_397(50-68).

| Peak# | Ret. Time | Area     | Height  | Area %  |
|-------|-----------|----------|---------|---------|
| 1     | 14.923    | 73772    | 9004    | 0.568   |
| 2     | 15.441    | 118940   | 9985    | 0.916   |
| 3     | 15.633    | 101532   | 18130   | 0.782   |
| 4     | 15.803    | 10299956 | 1508188 | 79.296  |
| 5     | 16.037    | 1126114  | 162584  | 8.670   |
| 6     | 16.150    | 339909   | 57774   | 2.617   |
| 7     | 16.301    | 429368   | 51494   | 3.306   |
| 8     | 16.512    | 343949   | 39608   | 2.648   |
| 9     | 16.704    | 78667    | 9778    | 0.606   |
| 10    | 16.917    | 35591    | 3302    | 0.274   |
| 11    | 17.237    | 17034    | 1568    | 0.131   |
| 12    | 17.558    | 5119     | 436     | 0.039   |
| 13    | 17.950    | 136      | 34      | 0.001   |
| 14    | 18.571    | 19167    | 3321    | 0.148   |
| Total |           | 12989254 | 1875204 | 100.000 |

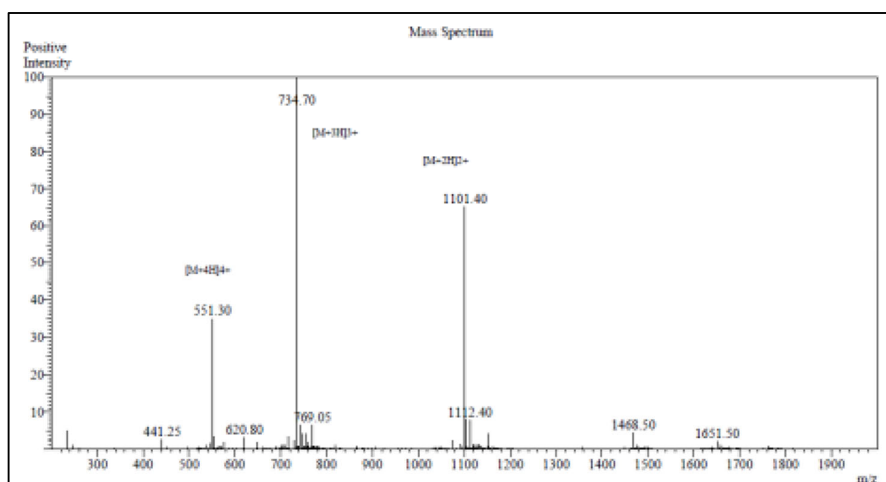

**Figure S2.** Mass spectrum of peptide KP\_397(50-68) detected at  $m/z$   $[M+2H]^{2+}$  1101.04,  $[M+3H]^{3+}$  734.70, and  $[M+4H]^{4+}$  551.30 theoretical molecular weight 2201.58 Da and observed molecular weight 2201.10 Da). Sample was dissolved in 50% methanol ( $v/v$ ), analysis was carried out by direct infusion using electrospray ionization in positive mode (Nebulizing Gas Flow: 1.5L/min, Drying Gas Flow :5 L/min, T. Flow :0.2 ml/min, B. conc :50%H<sub>2</sub>O/50%MeOH, CDL Temp: 250°C, and Block Temp:200°C).
